# Supplementary material
Source: PubMed Central journal article supplement (PMC7592647)
Supplement: NIHMS1630226-supplement-supplementary.pdf [file NIHMS1630226-supplement-supplementary.pdf]

**CNCR\_32339\_e.Supporting Information\_Table S1. Relationships between clinical response, baseline levels of plasma cytokines/chemokines, PD-1, PD-L1/PD-L2, and other features**

| <b>Features</b>     | <b>No. of Cases</b> | <b>Responders<br/>( N=12)</b> | <b>Non-responder<br/>s (N=12)</b> | <b>P-value</b> |
|---------------------|---------------------|-------------------------------|-----------------------------------|----------------|
| <b>Total N=24</b>   |                     |                               |                                   |                |
| <u>Gender</u>       |                     |                               |                                   |                |
| Males               | 21                  | 11 (52%)                      | 10 (48%)                          | 1.000          |
| Females             | 3                   | 1 (33%)                       | 2 (67%)                           |                |
| <u>Age</u>          |                     |                               |                                   |                |
| < 60 years          | 5                   | 2 (40%)                       | 3 (60%)                           | 1.000          |
| ≥ 60 years          | 19                  | 10 (53%)                      | 9 (47%)                           |                |
| <u>Tumor sizes</u>  |                     |                               |                                   |                |
| < 50 mm             | 10                  | 5 (50%)                       | 5 (50%)                           | 1.000          |
| ≥ 50 mm             | 14                  | 7 (50%)                       | 7 (50%)                           |                |
| <u>HCV</u>          |                     |                               |                                   |                |
| Positive            | 8                   | 4 (50%)                       | 4 (50%)                           | 1.000          |
| Negative            | 16                  | 8 (50%)                       | 8 (50%)                           |                |
| <u>HBV</u>          |                     |                               |                                   |                |
| Positive            | 5                   | 3 (60%)                       | 2 (40%)                           | 1.000          |
| Negative            | 19                  | 9 (47%)                       | 10 (53%)                          |                |
| <u>Tumor PD-L1</u>  |                     |                               |                                   |                |
| Positive            | 3                   | 1 (33%)                       | 2 (67%)                           | 1.000          |
| Negative            | 6                   | 2 (33%)                       | 4 (67%)                           |                |
| <u>Plasma TGF-β</u> |                     |                               |                                   |                |
| < 200 pg/ml         | 12                  | 10 (67%)                      | 2 (33%)                           | <b>0.003</b>   |
| ≥ 200 pg/ml         | 12                  | 2 (18%)                       | 10 (82%)                          |                |
| <u>Plasma IL-1β</u> |                     |                               |                                   |                |
| < 3 pg/ml           | 15                  | 7 (47%)                       | 8 (53%)                           | 1.000          |
| ≥ 3 pg/ml           | 9                   | 5 (56%)                       | 4 (44%)                           |                |
| <u>Plasma IL-12</u> |                     |                               |                                   |                |
| < 400 pg/ml         | 15                  | 7 (47%)                       | 8 (53%)                           | 1.000          |
| ≥ 400 pg/ml         | 9                   | 5 (56%)                       | 4 (44%)                           |                |
| <u>Plasma IL-18</u> |                     |                               |                                   |                |
| < 90 pg/ml          | 11                  | 5 (46%)                       | 6 (54%)                           | 1.000          |
| ≥ 90 pg/ml          | 13                  | 7 (54%)                       | 6 (46%)                           |                |

|                     |    |         |         |       |
|---------------------|----|---------|---------|-------|
| <u>Plasma IL-6</u>  |    |         |         |       |
| < 20 pg/ml          | 14 | 9 (64%) | 5 (36%) | 0.214 |
| ≥ 20 pg/ml          | 10 | 3 (30%) | 7 (70%) |       |
| <u>Plasma IFN-γ</u> |    |         |         |       |
| < 10 pg/ml          | 15 | 6 (40%) | 9 (60%) | 0.400 |
| ≥ 10 pg/ml          | 9  | 6 (67%) | 3 (33%) |       |
| <u>Plasma IL-10</u> |    |         |         |       |
| < 15 pg/ml          | 14 | 7 (50%) | 7 (50%) | 1.000 |
| ≥ 15 pg/ml          | 10 | 5 (50%) | 5 (50%) |       |
| <u>Plasma IL-8</u>  |    |         |         |       |
| < 20 pg/ml          | 12 | 6 (50%) | 6 (50%) | 1.000 |
| ≥20 pg/ml           | 12 | 6 (50%) | 6 (50%) |       |
| <u>Plasma CXCL9</u> |    |         |         |       |
| < 500 pg/ml         | 14 | 6 (43%) | 8 (57%) | 0.680 |
| ≥ 500 pg/ml         | 10 | 6 (60%) | 4 (40%) |       |
| <u>Plasma CCL4</u>  |    |         |         |       |
| < 60 pg/ml          | 11 | 6 (55%) | 5 (45%) | 1.000 |
| ≥ 60 pg/ml          | 13 | 6 (46%) | 7 (54%) |       |
| <u>Plasma CCL5</u>  |    |         |         |       |
| < 900 pg/ml         | 13 | 7 (54%) | 6 (46%) | 1.000 |
| ≥ 900 pg/ml         | 11 | 5 (46%) | 6 (54%) |       |
| <u>Plasma PD-1</u>  |    |         |         |       |
| < 200 pg/ml         | 16 | 8 (50%) | 8 (50%) | 1.000 |
| ≥ 200 pg/ml         | 8  | 4 (50%) | 4 (50%) |       |
| <u>Plasma PD-L1</u> |    |         |         |       |
| < 200 pg/ml         | 13 | 6 (46%) | 7 (54%) | 1.000 |
| ≥ 200 pg/ml         | 11 | 6 (54%) | 5 (46%) |       |
| <u>Plasma PD-L2</u> |    |         |         |       |
| < 6 ng/ml           | 12 | 6 (50%) | 6 (50%) | 1.000 |
| ≥ 6 ng/ml           | 12 | 6 (50%) | 6 (50%) |       |

---

**CNCR\_32339\_e.Supporting Information\_Table S2. Relationships between baseline plasma TGF- $\beta$  levels, clinical features, and other biomarkers in 24 HCC patients**

| <b>Features</b>                      | <b>No. of Cases</b> | <b>TGF-<math>\beta</math> &lt; 200 pg/ml (N=12)</b> | <b>TGF-<math>\beta</math> <math>\geq</math> 200 pg/ml (N=12)</b> | <b>P-value</b> |
|--------------------------------------|---------------------|-----------------------------------------------------|------------------------------------------------------------------|----------------|
| <b>Total N=24</b>                    |                     |                                                     |                                                                  |                |
| <u>Gender</u>                        |                     |                                                     |                                                                  |                |
| Males                                | 21                  | 11 (52%)                                            | 10 (48%)                                                         | 1.000          |
| Females                              | 3                   | 1 (33%)                                             | 2 (67%)                                                          |                |
| <u>Age</u>                           |                     |                                                     |                                                                  |                |
| < 60 years                           | 5                   | 2 (40%)                                             | 3 (60%)                                                          | 1.000          |
| $\geq$ 60 years                      | 19                  | 10 (53%)                                            | 9 (47%)                                                          |                |
| <u>Tumor sizes</u>                   |                     |                                                     |                                                                  |                |
| < 50 mm                              | 14                  | 7 (50%)                                             | 7 (50%)                                                          | 1.000          |
| $\geq$ 50 mm                         | 10                  | 5 (50%)                                             | 5 (50%)                                                          |                |
| <u>HCV</u>                           |                     |                                                     |                                                                  |                |
| Positive                             | 7                   | 5 (71%)                                             | 2 (29%)                                                          | 0.371          |
| Negative                             | 17                  | 7 (41%)                                             | 10 (59%)                                                         |                |
| <u>HBV</u>                           |                     |                                                     |                                                                  |                |
| Positive                             | 5                   | 2 (40%)                                             | 3 (60%)                                                          | 1.000          |
| Negative                             | 19                  | 10 (53%)                                            | 9 (47%)                                                          |                |
| <u>Tumor PD-L1</u>                   |                     |                                                     |                                                                  |                |
| Positive                             | 3                   | 1 (33%)                                             | 2 (67%)                                                          | 1.000          |
| Negative                             | 6                   | 3 (50%)                                             | 3 (50%)                                                          |                |
| <u>Plasma IL-1<math>\beta</math></u> |                     |                                                     |                                                                  |                |
| < 3 pg/ml                            | 15                  | 7 (47%)                                             | 8 (53%)                                                          | 1.000          |
| $\geq$ 3 pg/ml                       | 9                   | 5 (56%)                                             | 4 (44%)                                                          |                |
| <u>Plasma IL-12</u>                  |                     |                                                     |                                                                  |                |
| < 400 pg/ml                          | 15                  | 7 (47%)                                             | 8 (53%)                                                          | 1.000          |
| $\geq$ 400 pg/ml                     | 9                   | 5 (56%)                                             | 4 (44%)                                                          |                |
| <u>Plasma IL-18</u>                  |                     |                                                     |                                                                  |                |
| < 90 pg/ml                           | 11                  | 5 (46%)                                             | 6 (54%)                                                          | 1.000          |
| $\geq$ 90 pg/ml                      | 13                  | 7 (54%)                                             | 6 (46%)                                                          |                |

Plasma IL-6

|            |    |         |         |       |
|------------|----|---------|---------|-------|
| < 20 pg/ml | 14 | 8 (57%) | 6 (43%) | 0.680 |
| ≥ 20 pg/ml | 10 | 4 (40%) | 6 (60%) |       |

Plasma IFN-γ

|            |    |         |         |       |
|------------|----|---------|---------|-------|
| < 10 pg/ml | 15 | 6 (40%) | 9 (60%) | 0.400 |
| ≥ 10 pg/ml | 9  | 6 (67%) | 3 (33%) |       |

Plasma IL-10

|            |    |         |         |       |
|------------|----|---------|---------|-------|
| < 15 pg/ml | 14 | 6 (43%) | 8 (57%) | 1.000 |
| ≥ 15 pg/ml | 10 | 6 (60%) | 4 (40%) |       |

Plasma IL-8

|            |    |         |         |       |
|------------|----|---------|---------|-------|
| < 20 pg/ml | 8  | 5 (63%) | 3 (37%) | 0.667 |
| ≥ 20 pg/ml | 16 | 7 (44%) | 9 (56%) |       |

Plasma CXCL9

|             |    |         |         |       |
|-------------|----|---------|---------|-------|
| < 500 pg/ml | 15 | 6 (40%) | 9 (60%) | 0.400 |
| ≥ 500 pg/ml | 9  | 6 (67%) | 3 (33%) |       |

Plasma CCL4

|            |    |         |         |       |
|------------|----|---------|---------|-------|
| < 60 pg/ml | 11 | 5 (46%) | 6 (54%) | 1.000 |
| ≥ 60 pg/ml | 13 | 7 (54%) | 6 (46%) |       |

Plasma CCL5

|             |    |         |         |       |
|-------------|----|---------|---------|-------|
| < 900 pg/ml | 13 | 7 (54%) | 6 (46%) | 1.000 |
| ≥ 900 pg/ml | 11 | 5 (46%) | 6 (54%) |       |

Plasma PD-1

|             |    |         |         |       |
|-------------|----|---------|---------|-------|
| < 200 pg/ml | 15 | 7 (47%) | 8 (53%) | 1.000 |
| ≥ 200 pg/ml | 9  | 5 (56%) | 4 (44%) |       |

Plasma PD-L1

|             |    |         |         |       |
|-------------|----|---------|---------|-------|
| < 200 pg/ml | 13 | 5 (38%) | 8 (62%) | 0.414 |
| ≥ 200 pg/ml | 11 | 7 (64%) | 4 (36%) |       |

Plasma PD-L2

|           |    |         |         |       |
|-----------|----|---------|---------|-------|
| < 6ng/ml  | 12 | 5 (42%) | 7 (58%) | 0.684 |
| ≥ 6 ng/ml | 12 | 7 (58%) | 5 (42%) |       |

---
